# Supplementary material for: Association of Online Consumer Reviews of Skilled Nursing Facilities With Patient Rehospitalization Rates
Source: PubMed Central journal article supplement (PMC7225899; doi:10.1001/jamanetworkopen.2020.4682), 2020-05-14
Supplement: jamanetwopen-3-e204682-s001.pdf [file jamanetwopen-3-e204682-s001.pdf]

## Supplementary Online Content

Ryskina KL, Andy AU, Manges KA, Foley KA, Werner RM, Merchant RM. Association of online consumer reviews of skilled nursing facilities with patient rehospitalization rates. *JAMA Netw Open*. 2020;3(5):e204682. doi:10.1001/jamanetworkopen.2020.4682

**eTable 1.** Risk-Standardized 30-Day Hospital Readmission Rates from SNF by SNF Yelp and Nursing Home Compare Ratings: Sub-sample of SNFs with at Least Three Reviews

**eTable 2.** Risk-Standardized 30-Day Hospital Readmission Rates from SNF by SNF Yelp and Nursing Home Compare Ratings: Main Study Sample, Models Adjusted for SNF Characteristics

**eFigure.** Sample Selection

This supplementary material has been provided by the authors to give readers additional information about their work.

eTable 1. Risk-Standardized 30-Day Hospital Readmission Rates from SNF by SNF Yelp and Nursing Home Compare Ratings: Sub-sample of SNFs with Three or More Reviews

|                                         | Models with NHC Ratings |           | Models with Yelp Ratings |           | Models with both NHC and Yelp Ratings |           |
|-----------------------------------------|-------------------------|-----------|--------------------------|-----------|---------------------------------------|-----------|
|                                         | Readmission Rate, %     | 95% CI    | Readmission Rate, %      | 95% CI    | Readmission Rate, %                   | 95% CI    |
| <b>Nursing Home Compare Star Rating</b> |                         |           |                          |           |                                       |           |
| 1-star (Worst)                          | 23.6                    | 23.0-24.3 | -                        | -         | 23.5                                  | 22.9-24.2 |
| 2-star                                  | 22.9                    | 22.5-23.4 | -                        | -         | 22.9                                  | 22.5-23.4 |
| 3-star                                  | 22.7*                   | 22.3-23.2 | -                        | -         | 22.7                                  | 22.2-23.1 |
| 4-star                                  | 22.8*                   | 22.5-23.2 | -                        | -         | 22.8                                  | 22.5-23.2 |
| 5-star (Best)                           | 21.8*                   | 21.5-22.1 | -                        | -         | 22.0                                  | 21.7-22.3 |
|                                         |                         |           |                          |           |                                       |           |
| <b>Yelp rating</b>                      |                         |           |                          |           |                                       |           |
| <1.5 (Worst)                            | -                       | -         | 22.7                     | 22.3-23.2 | 22.9                                  | 22.5-23.4 |
| 1.5-2.4                                 | -                       | -         | 23.0                     | 22.6-23.3 | 22.9                                  | 22.6-23.3 |
| 2.5-3.4                                 | -                       | -         | 22.6                     | 22.3-22.9 | 22.6                                  | 22.2-22.9 |
| 3.5-4.4                                 | -                       | -         | 22.0*                    | 21.6-22.4 | 22.1                                  | 21.6-22.5 |
| >4.4 (Best)                             | -                       | -         | 21.7*                    | 21.1-22.3 | 22.0                                  | 21.4-22.6 |
|                                         |                         |           |                          |           |                                       |           |
| <b>NHC and Yelp Ratings</b>             |                         |           |                          |           |                                       |           |
| 1-star & <1.5 Yelp rating (Worst)       | -                       | -         | -                        | -         | 22.9                                  | 21.6-24.2 |
| 2-star & 1.5-2.4 Yelp rating            | -                       | -         | -                        | -         | 22.6                                  | 21.8-23.4 |
| 3-star & 2.5-3.4 Yelp rating            | -                       | -         | -                        | -         | 22.8                                  | 21.9-23.7 |
| 4-star & 3.5-4.4 Yelp rating            | -                       | -         | -                        | -         | 22.9                                  | 22.1-23.8 |
| 5-star & >4.4 Yelp rating (Best)        | -                       | -         | -                        | -         | 22.0                                  | 20.1-21.9 |
|                                         |                         |           |                          |           |                                       |           |
| Adjusted R <sup>2</sup>                 | 0.012                   |           | 0.006                    |           | 0.020 <sup>#</sup>                    |           |

Note: SNF, skilled nursing facility; NHC, Nursing Home Compare

\* Significantly different from the reference group (lowest rating) at p<0.05

<sup>#</sup> Significantly different from Nursing Home Compare Rating only model at p<0.05

eTable 2. Risk-Standardized 30-Day Hospital Readmission Rates from SNF by SNF Yelp and Nursing Home Compare Ratings: Main Study Sample, Models with SNF Characteristics

|                                         | Models with NHC Rating |           | Models with Yelp Rating |           | Models with both NHC and Yelp Ratings |           |
|-----------------------------------------|------------------------|-----------|-------------------------|-----------|---------------------------------------|-----------|
|                                         | Readmission Rate, %    | 95% CI    | Readmission Rate, %     | 95% CI    | Readmission Rate, %                   | 95% CI    |
| <b>Nursing Home Compare Star Rating</b> |                        |           |                         |           |                                       |           |
| 1-star (Worst)                          | 23.2                   | 22.7-23.8 | -                       | -         | 23.3                                  | 22.7-23.8 |
| 2-star                                  | 22.7                   | 22.3-23.1 | -                       | -         | 22.8                                  | 22.3-23.2 |
| 3-star                                  | 22.7                   | 22.3-23.1 | -                       | -         | 22.6                                  | 22.2-23.0 |
| 4-star                                  | 22.8                   | 22.5-23.1 | -                       | -         | 22.8                                  | 22.5-23.1 |
| 5-star (Best)                           | 21.8*                  | 21.5-22.1 | -                       | -         | 21.8*                                 | 21.5-22.1 |
| <b>Yelp rating</b>                      |                        |           |                         |           |                                       |           |
| <1.5 (Worst)                            | -                      | -         | 22.6                    | 22.2-23.0 | 22.5                                  | 22.1-22.9 |
| 1.5-2.4                                 | -                      | -         | 22.8                    | 22.4-23.1 | 22.8                                  | 22.4-23.1 |
| 2.5-3.4                                 | -                      | -         | 22.5                    | 22.2-22.8 | 22.5                                  | 22.2-22.8 |
| 3.5-4.4                                 | -                      | -         | 22.1                    | 21.7-22.5 | 22.2                                  | 21.8-22.6 |
| >4.4 (Best)                             | -                      | -         | 22.0*                   | 21.6-22.5 | 22.1*                                 | 21.6-22.6 |
| <b>NHC and Yelp Ratings</b>             |                        |           |                         |           |                                       |           |
| 1-star & <1.5 Yelp rating (Worst)       | -                      | -         | -                       | -         | 23.3                                  | 22.6-23.9 |
| 2-star & 1.5-2.4 Yelp rating            | -                      | -         | -                       | -         | 23.1                                  | 22.6-23.6 |
| 3-star & 2.5-3.4 Yelp rating            | -                      | -         | -                       | -         | 22.8                                  | 22.3-23.2 |
| 4-star & 3.5-4.4 Yelp rating            | -                      | -         | -                       | -         | 22.5                                  | 22.0-23.0 |
| 5-star & >4.4 Yelp rating (Best)        | -                      | -         | -                       | -         | 21.2*                                 | 20.7-21.8 |
| <b>SNF Characteristics</b>              |                        |           |                         |           |                                       |           |
| Region                                  |                        |           |                         |           |                                       |           |
| West                                    | 21.9                   | 21.6-22.2 | 21.9                    | 21.6-22.1 | 21.9                                  | 21.6-22.1 |
| Northeast                               | 22.6*                  | 22.2-23.0 | 22.6*                   | 22.2-23.0 | 22.6*                                 | 22.2-23.0 |
| South                                   | 22.9*                  | 22.5-23.3 | 22.9*                   | 22.6-23.3 | 22.9*                                 | 22.5-23.3 |
| Midwest                                 | 23.6*                  | 23.1-24.0 | 23.6*                   | 23.2-24.1 | 23.6*                                 | 23.2-24.1 |
| (continued on next page)                |                        |           |                         |           |                                       |           |

Note: SNF, skilled nursing facility; NHC, Nursing Home Compare

\* Significantly different from the reference group (lowest rating) at  $p < 0.05$

# Significantly different from Nursing Home Compare Rating only model at  $p < 0.05$

eTable 2 (continued). Risk-Standardized 30-Day Hospital Readmission Rates from SNF by SNF Yelp and Nursing Home Compare Ratings: Main Study Sample, Models with SNF Characteristics

|                            | Models with NHC Rating |           | Models with Yelp Rating |           | Models with both NHC and Yelp Ratings |           |
|----------------------------|------------------------|-----------|-------------------------|-----------|---------------------------------------|-----------|
|                            | Readmission Rate, %    | 95% CI    | Readmission Rate, %     | 95% CI    | Readmission Rate, %                   | 95% CI    |
| Location                   |                        |           |                         |           |                                       |           |
| Urban                      | 22.5                   | 22.4-22.7 | 22.5                    | 22.4-22.7 | 22.5                                  | 22.4-22.7 |
| Rural                      | 19.8*                  | 18.5-21.1 | 20.0*                   | 18.6-21.3 | 19.8*                                 | 18.5-21.2 |
| Size                       |                        |           |                         |           |                                       |           |
| Small (<100 beds)          | 22.4                   | 21.9-22.9 | 22.4                    | 21.8-22.9 | 22.5                                  | 21.9-23.0 |
| Medium (100-199 beds)      | 22.2                   | 21.7-22.6 | 22.2                    | 21.8-22.7 | 22.2                                  | 21.7-22.6 |
| Large (200 or more beds)   | 21.7                   | 20.9-22.5 | 21.8                    | 21.0-22.7 | 21.7                                  | 20.8-22.5 |
| Ownership                  |                        |           |                         |           |                                       |           |
| Non profit                 | 21.8                   | 21.4-22.1 | 21.7                    | 21.3-22.1 | 21.8                                  | 21.4-22.2 |
| For profit                 | 22.7*                  | 22.5-22.9 | 22.7*                   | 22.5-22.9 | 22.7*                                 | 22.5-22.9 |
| Any advanced practitioners |                        |           |                         |           |                                       |           |
| No                         | 22.5                   | 22.2-22.6 | 22.5                    | 22.2-22.7 | 22.5                                  | 22.2-22.7 |
| Yes                        | 22.5                   | 22.2-22.7 | 22.5                    | 22.2-22.7 | 22.5                                  | 22.2-22.7 |
| Part of a chain            |                        |           |                         |           |                                       |           |
| No                         | 22.1                   | 21.7-22.4 | 22.0                    | 21.6-22.4 | 22.1                                  | 21.7-22.4 |
| Yes                        | 22.7*                  | 22.5-22.9 | 22.6*                   | 22.4-22.8 | 22.6*                                 | 22.4-22.8 |
| Hospital-based             |                        |           |                         |           |                                       |           |
| No                         | 22.4                   | 22.3-22.6 | 22.4                    | 22.3-22.6 | 22.4                                  | 22.3-22.6 |
| Yes                        | 24.0*                  | 22.5-25.5 | 23.8*                   | 22.3-25.3 | 23.9                                  | 22.4-25.4 |
| Adjusted R <sup>2</sup>    | 0.033                  |           | 0.033                   |           | 0.040 <sup>#</sup>                    |           |

Note: SNF, skilled nursing facility; NHC, Nursing Home Compare

\* Significantly different from the reference group at p<0.05

<sup>#</sup> Significantly different from Nursing Home Compare Rating only model at p<0.05

eFigure. Sample Selection

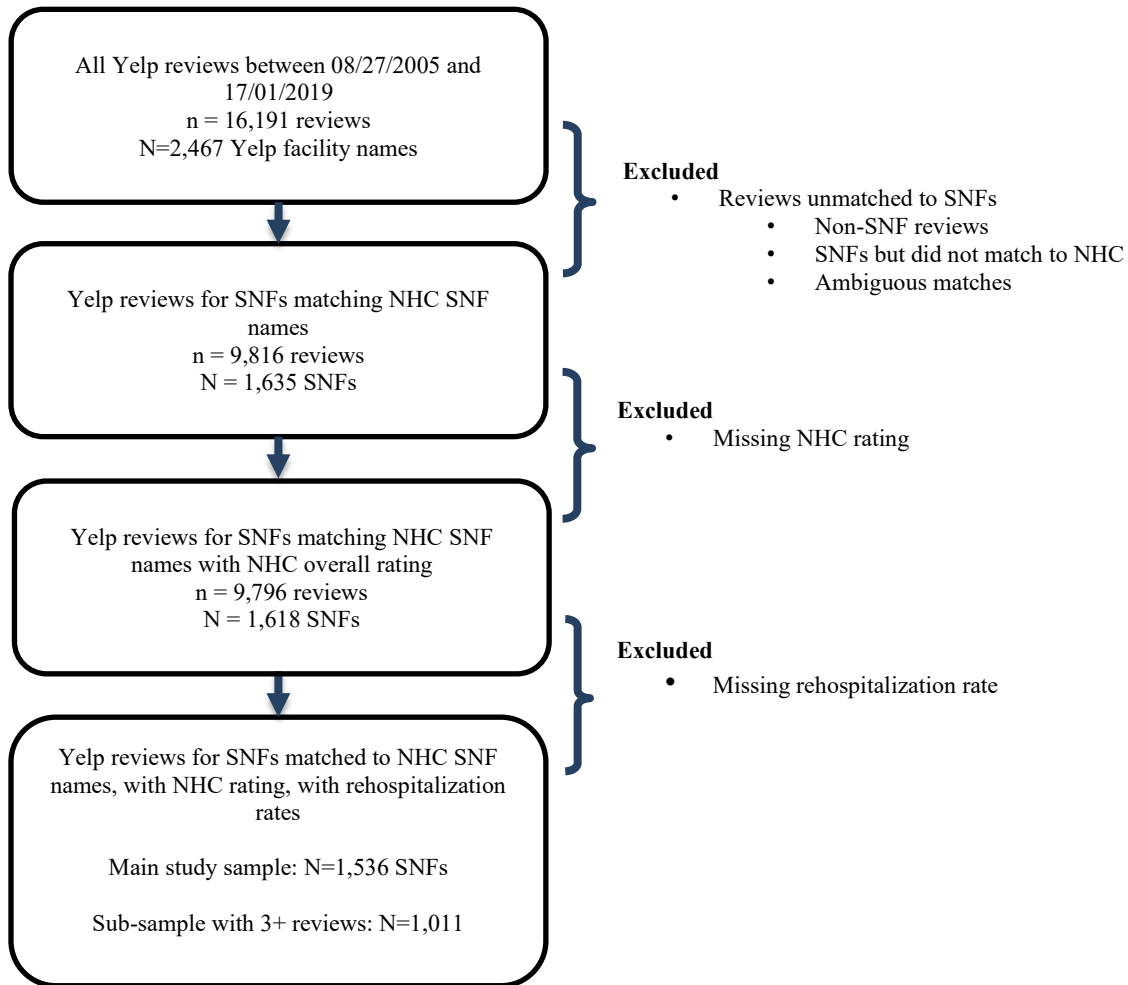

Note: SNF, skilled nursing facility; NHC, Nursing Home Compare
